# Supplementary material for: A theoretical insight into atmospheric chemistry of HFE-7100 and perfluoro-butyl formate: reactions with OH radicals and Cl atoms and the fate of alkoxy radicals
Source: Royal Society of Chemistry journal article supplement (doi:10.1039/c5nj02752g), 2016-01-01
Supplement: c5nj02752g1.pdf [file c5nj02752g1.pdf]

## **SUPPORTING INFORMATION**

### **A theoretical insight on atmospheric chemistry of HFE-7100 and Perfluoro-butyl Formate: reactions with OH radicals and Cl atoms and fate of alkoxy radical**

Bhupesh Kumar Mishra<sup>a</sup>, Makroni Lily<sup>b</sup>, Ramesh Chandra Deka<sup>c\*</sup> and Asit K. Chandra<sup>b\*\*</sup>

<sup>a</sup>Department of Chemistry, D. N. Government College, Itanagar, Arunachal Pradesh-791113, India

<sup>b</sup>Department of Chemistry, North - Eastern Hill University, Shillong - 793 022, India

<sup>c</sup>Department of Chemical Sciences, Tezpur University Tezpur, Assam - 784 028, India

\*To whom correspondence should be addressed: Email-addresses: [ramesh@tezu.ernet.in](mailto:ramesh@tezu.ernet.in) (R. C. Deka) & [akchandra@nehu.ac.in](mailto:akchandra@nehu.ac.in) (A. K. Chandra)

**Table S1** Harmonic vibrational frequencies of reactants, reaction complexes, transition states, product complexes and products at M06-2X/6-31+G(d,p) level of theory.

| Species                                           | Vibrational Frequencies (cm <sup>-1</sup> )                                                                                                                                                                                                                                                    |
|---------------------------------------------------|------------------------------------------------------------------------------------------------------------------------------------------------------------------------------------------------------------------------------------------------------------------------------------------------|
| n-C <sub>4</sub> F <sub>9</sub> OCH <sub>3</sub>  | 46, 53, 64, 76, 111, 153, 166, 212, 222, 243, 248, 293, 328, 336, 338, 363, 387, 425, 513, 536, 551, 594, 607, 630, 704, 751, 801, 899, 1066, 1152, 1182, 1191, 1197, 1209, 1260, 1272, 1290, 1296, 1313, 1364, 1387, 1449, 1496, 1508, 1516, 3094, 3182, 3216                                 |
| OH                                                | 3758                                                                                                                                                                                                                                                                                           |
| RC1                                               | 37, 48, 67, 71, 84, 114, 126, 142, 169, 177, 186, 214, 227, 247, 255, 296, 328, 338, 341, 366, 379, 389, 428, 512, 537, 553, 594, 607, 630, 704, 751, 802, 897, 1057, 1150, 1182, 1190, 1198, 1209, 1249, 1274, 1291, 1302, 1309, 1369, 1388, 1446, 1505, 1520, 3098, 3194, 3224, 3757         |
| RC2                                               | 32, 44, 54, 58, 67, 84, 111, 121, 161, 176, 216, 237, 245, 270, 292, 328, 336, 341, 364, 389, 427, 514, 536, 557, 596, 608, 632, 706, 750, 802, 898, 1057, 1153, 1183, 1200, 1202, 1214, 1264, 1278, 1288, 1305, 1320, 1368, 1391, 1446, 1493, 1507, 1513, 3097, 3191, 3218                    |
| TS1                                               | 1194i, 26, 43, 45, 66, 104, 113, 147, 169, 208, 217, 224, 245, 253, 293, 302, 330, 338, 349, 364, 389, 429, 514, 536, 552, 593, 607, 630, 705, 746, 777, 805, 866, 907, 1091, 1157, 1166, 1195, 1202, 1218, 1263, 1270, 1290, 1297, 1315, 1354, 1366, 1388, 1450, 1472, 1499, 3128, 3230, 3789 |
| TS2                                               | 730i, 15, 23, 42, 60, 66, 111, 136, 167, 210, 220, 244, 249, 292, 328, 333, 338, 364, 378, 389, 429, 514, 535, 549, 561, 593, 606, 632, 704, 751, 799, 902, 934, 976, 1122, 1180, 1200, 1207, 1225, 1232, 1265, 1276, 1290, 1293, 1315, 1365, 1379, 1447, 1483, 3146, 3277                     |
| PC1                                               | 12, 34, 39, 68, 78, 90, 117, 135, 169, 201, 214, 221, 241, 247, 249, 269, 293, 328, 334, 340, 355, 364, 391, 427, 513, 536, 551, 593, 608, 631, 703, 709, 752, 800, 906, 1118, 1175, 1195, 1206, 1212, 1262, 1271, 1294, 1297, 1316, 1365, 1383, 1448, 1488, 1621, 3205, 3356, 3857, 3983      |
| PC2                                               | 22, 23, 43, 53, 65, 69, 110, 138, 164, 210, 223, 238, 245, 250, 292, 312, 327, 337, 342, 364, 378, 391, 427, 514, 536, 552, 595, 606, 631, 704, 742, 754, 801, 905, 1122, 1178, 1198, 1212, 1220, 1265, 1273, 1291, 1294, 1315, 1367, 1383, 1448, 1486, 2835, 3196, 3347                       |
| H <sub>2</sub> O                                  | 1596, 3887, 4012                                                                                                                                                                                                                                                                               |
| HCl                                               | 3031                                                                                                                                                                                                                                                                                           |
| n-C <sub>4</sub> F <sub>9</sub> OC•H <sub>2</sub> | 43, 53, 66, 89, 111, 166, 204, 218, 222, 243, 247, 293, 330, 336, 345, 363, 388, 425, 512, 536, 551, 589, 605, 609, 631, 704, 752, 799, 906, 1118, 1175, 1194, 1206, 1208, 1262, 1275, 1292, 1301, 1315, 1366, 1385, 1448, 1482, 3200, 3355                                                    |
| C <sub>4</sub> F <sub>9</sub> OCH <sub>2</sub> O• | 37, 46, 56, 66, 105, 115, 165, 204, 215, 240, 249, 285, 293, 330, 336, 362, 386, 414, 483, 535, 547, 564, 604, 622, 645, 703, 748, 779, 849, 897, 1021, 1139, 1154, 1188, 1201, 1211, 1258, 1269, 1283, 1287, 1311, 1359, 1367,                                                                |

|                                      |                                                                                                                                                                                                                                                                                             |
|--------------------------------------|---------------------------------------------------------------------------------------------------------------------------------------------------------------------------------------------------------------------------------------------------------------------------------------------|
|                                      | 1376, 1429, 1445, 3017, 3077                                                                                                                                                                                                                                                                |
| TS3                                  | 647i, 36, 42, 66, 91, 102, 135, 160, 192, 210, 233, 246, 262, 289, 302, 331, 347, 366, 387, 425, 499, 514, 544, 584, 597, 630, 691, 724, 749, 783, 924, 1134, 1164, 1198, 1209, 1230, 1250, 1262, 1281, 1288, 1313, 1351, 1367, 1433, 1471, 1610, 3058, 3155                                |
| TS4                                  | 1018i, 39, 45, 60, 92, 129, 157, 190, 214, 241, 243, 290, 294, 329, 334, 363, 386, 422, 475, 505, 539, 556, 585, 595, 607, 621, 648, 718, 751, 826, 942, 1028, 1084, 1158, 1202, 1216, 1259, 1266, 1285, 1292, 1316, 1366, 1375, 1392, 1445, 1787, 3097                                     |
| TS5                                  | 1673i, 21, 33, 48, 55, 62, 83, 107, 138, 160, 165, 191, 216, 242, 245, 287, 293, 330, 338, 364, 386, 425, 455, 479, 514, 539, 576, 585, 596, 614, 639, 714, 750, 820, 925, 988, 1056, 1148, 1180, 1188, 1202, 1255, 1263, 1285, 1291, 1298, 1315, 1360, 1368, 1392, 1444, 1626, 1695, 3034, |
| C <sub>4</sub> F <sub>9</sub> O•     | 53, 72, 73, 126, 174, 209, 232, 240, 291, 299, 328, 330, 359, 383, 407, 496, 527, 551, 576, 596, 627, 695, 702, 776, 919, 1086, 1176, 1202, 1233, 1267, 1270, 1297, 1302, 1318, 1360, 1421                                                                                                  |
| CH <sub>2</sub> O•                   | 1212, 1275, 1547, 1881, 2976, 3049                                                                                                                                                                                                                                                          |
| C <sub>4</sub> F <sub>9</sub> OC(O)H | 38, 45, 61, 92, 98, 139, 154, 188, 214, 241, 289, 292, 329, 335, 363, 386, 425, 488, 512, 539, 589, 596, 619, 648, 720, 751, 829, 949, 1033, 1057, 1163, 1203, 1226, 1259, 1267, 1286, 1294, 1317, 1367, 1374, 1433, 1448, 1949, 3143                                                       |
| HO• <sub>2</sub>                     | 1266, 1459, 3710                                                                                                                                                                                                                                                                            |
| TS6                                  | 1221i, 29, 44, 58, 61, 81, 99, 119, 161, 196, 213, 221, 242, 245, 269, 290, 293, 330, 336, 364, 387, 427, 448, 512, 537, 580, 592, 615, 637, 704, 739, 753, 775, 834, 950, 1024, 1049, 1160, 1204, 1225, 1264, 1270, 1288, 1300, 1318, 1367, 1374, 1414, 1447, 1986, 3780                   |
| TS7                                  | 1093i, 30, 40, 50, 56, 70, 91, 100, 158, 190, 212, 242, 243, 270, 290, 297, 311, 332, 338, 365, 386, 426, 509, 518, 539, 589, 600, 622, 654, 724, 751, 830, 918, 942, 1089, 1097, 1168, 1198, 1236, 1265, 1272, 1295, 1299, 1320, 1363, 1373, 1446, 2007                                    |
| C <sub>4</sub> F <sub>9</sub> OC(O)  | 38, 42, 60, 89, 94, 153, 186, 195, 213, 240, 242, 285, 291, 329, 336, 363, 386, 425, 482, 511, 539, 587, 593, 618, 643, 718, 751, 827, 935, 1033, 1153, 1201, 1244, 1255, 1268, 1289, 1295, 1318, 1363, 1370, 1443, 2007                                                                    |

---

**Table S2** Relative energies  $\Delta E$  (in  $\text{kJ mol}^{-1}$ ) with zero-point energy correction for the reactants, reaction complexes, transition states, product complexes and products at M06-2X/6-31+G(d,p) level of theory.

| Species                                                              | M06-2X/6-311++G(d,p) | M06-2X/6-31+G(d,p) | Species                                                 | M06-2X/6-311++G(d,p) | M06-2X/6-31+G(d,p) |
|----------------------------------------------------------------------|----------------------|--------------------|---------------------------------------------------------|----------------------|--------------------|
| n-C <sub>4</sub> F <sub>9</sub> OCH <sub>3</sub> + OH                | 0.00                 | 0.00               | TS3                                                     | 144.92               | 148.01             |
| RC1                                                                  | -13.41               | -12.58             | TS4                                                     | 105.16               | 92.71              |
| TS1                                                                  | 10.66                | 9.32               | TS5                                                     | 76.50                | 39.17              |
| PC1                                                                  | -72.31               | -69.97             | C <sub>4</sub> F <sub>9</sub> O• + CH <sub>2</sub> O•   | 108.38               | 112.10             |
| n-C <sub>4</sub> F <sub>9</sub> OC•H <sub>2</sub> + H <sub>2</sub> O | -66.33               | -64.70             | C <sub>4</sub> F <sub>9</sub> OC(O)H + H                | 55.42                | 59.90              |
| n-C <sub>4</sub> F <sub>9</sub> OCH <sub>3</sub> + Cl                | 0.00                 | 0.00               | C <sub>4</sub> F <sub>9</sub> OC(O)H + HO• <sub>2</sub> | -137.85              | -137.27            |
| RC2                                                                  | -14.88               | -12.83             | C <sub>4</sub> F <sub>9</sub> OC(O)H + OH/Cl            | 0.00                 | 0.00               |
| TS2                                                                  | 4.38                 | 5.18               | TS6                                                     | 8.07                 | 6.60               |
| PC2                                                                  | -8.61                | -4.01              | TS7                                                     | 5.73                 | 7.19               |
| n-C <sub>4</sub> F <sub>9</sub> OC•H <sub>2</sub> + HCl              | -2.00                | 2.92               | C <sub>4</sub> F <sub>9</sub> OC(O) + H <sub>2</sub> O  | -81.00               | -79.04             |
| n-C <sub>4</sub> F <sub>9</sub> OCH <sub>2</sub> O• + O <sub>2</sub> | 0.00                 | 0.00               | C <sub>4</sub> F <sub>9</sub> OC(O) + HCl               | -16.72               | -11.37             |

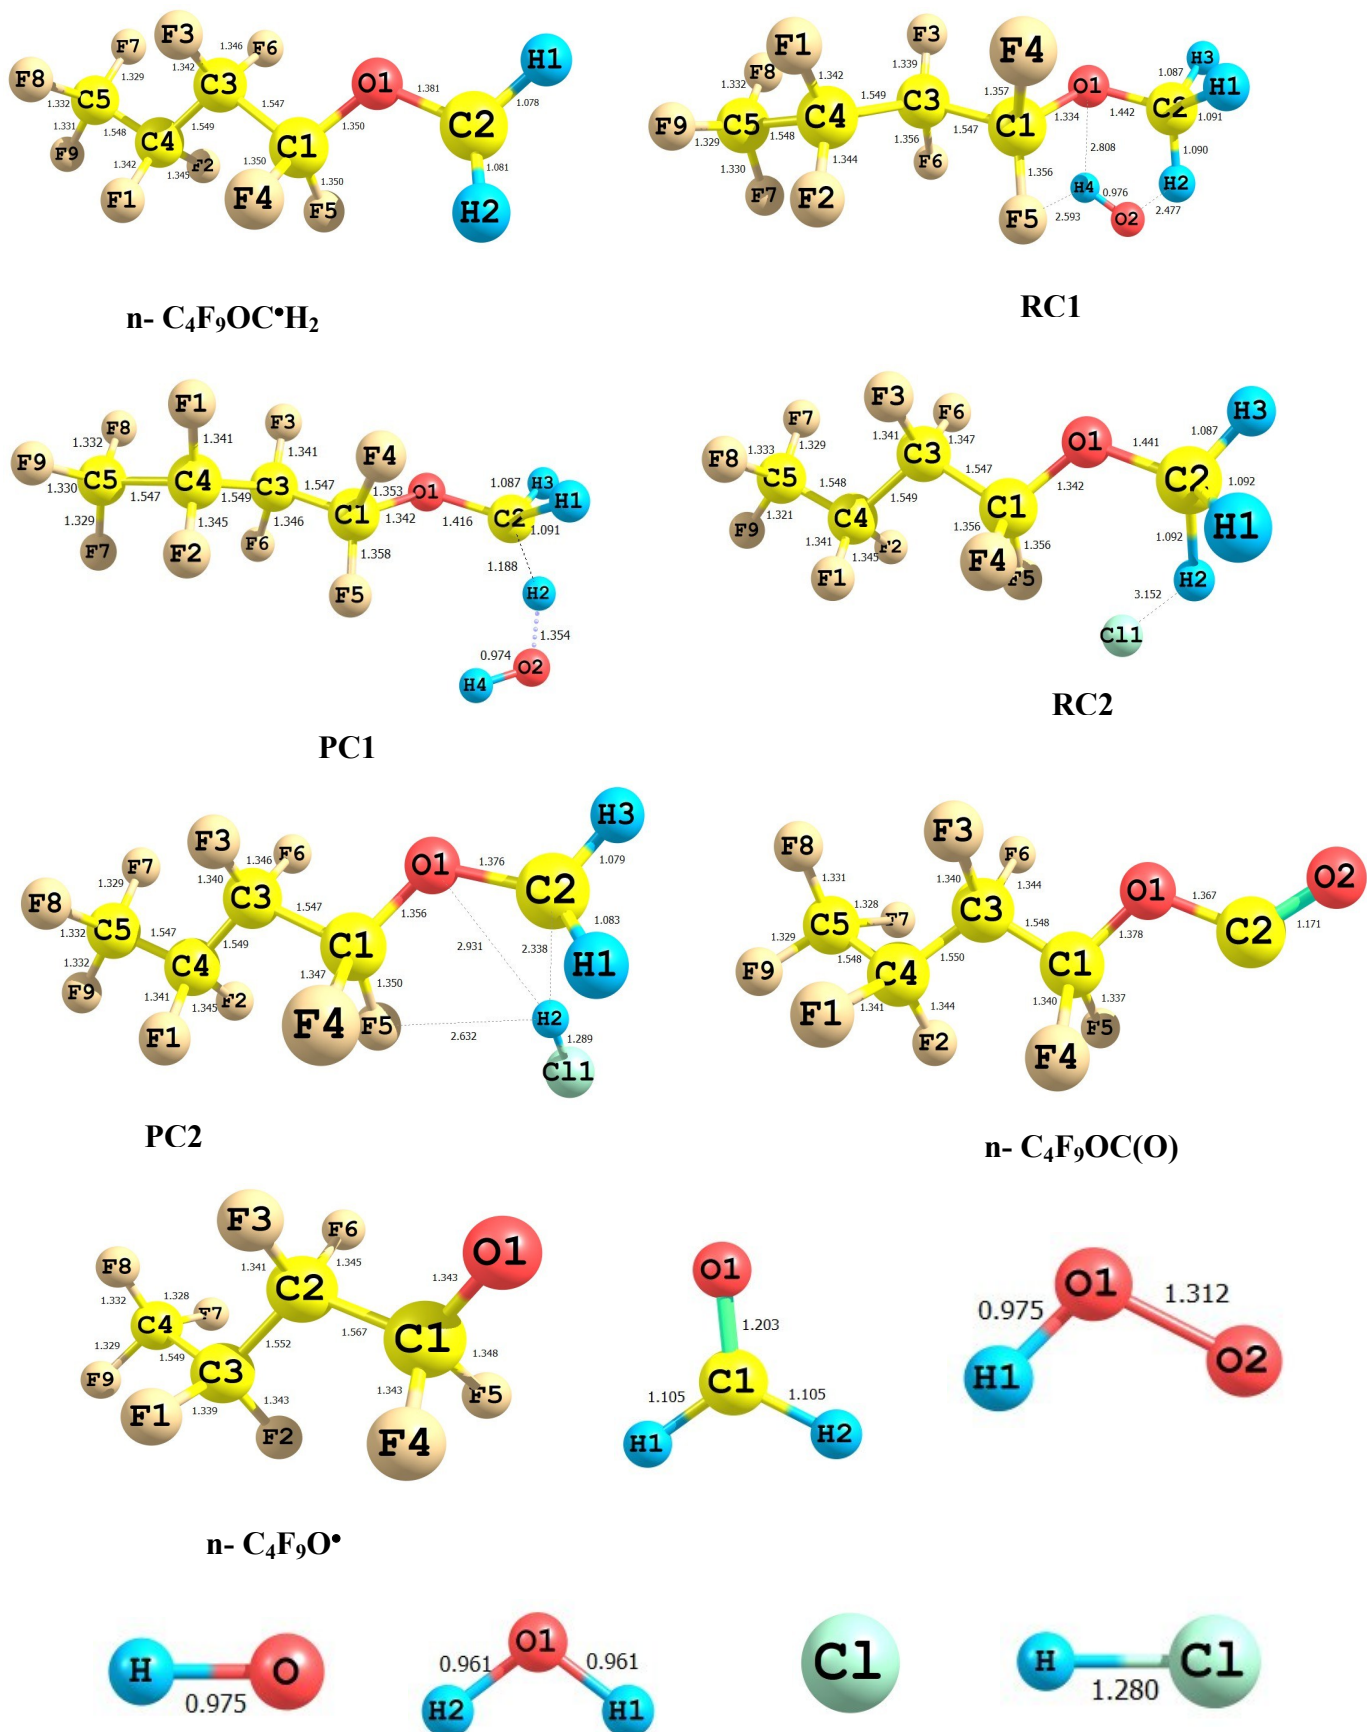

**Fig. S1.** Optimized geometries of reactant complexes, product complexes and products at M06-2X/6-31+G(d,p) level of theory. Bond lengths are in Angstroms.
